# Supplementary material for: Theoretical study of the bridging effect on the charge carrier transport properties of cyclooctatetrathiophene and its derivatives
Source: Royal Society of Chemistry journal article supplement (doi:10.1039/c2jm14871d), 2012-01-01

## Electronic Supplementary Information

### Theoretical Study of Bridging Effect on the Charge Carrier Transport Properties of Cyclooctatetrathiophene and Its Derivatives

Xiao-Dan Tang,<sup>a, b</sup> Yi Liao,<sup>\*a, b</sup> Hong-Ze Gao,<sup>c</sup> Yun Geng,<sup>b</sup> and Zhong-Min Su<sup>\*a, b</sup>

<sup>a</sup> Department of Chemistry, Capital Normal University, Beijing 100048, People's Republic of China

<sup>b</sup> Institute of Functional Material Chemistry, Faculty of Chemistry, Northeast Normal University, Changchun 130024, Jilin, People's Republic of China

<sup>c</sup> Fundamental Department, Chinese People's Armed Police Force Academy, Langfang 065000, Hebei, People's Republic of China

E-mail addresses: [liaoy271@nenu.edu.cn](mailto:liaoy271@nenu.edu.cn), [zmsu@nenu.edu.cn](mailto:zmsu@nenu.edu.cn)

Phone: +86-431-85099108; Fax: 86-431-85684009

**Table S1** Selected bond lengths (unit: Å) of systems **1-4** at optimized ground state

| System   | Bond length | Expt. | B3P86      |             | PBE0       |             | B3LYP      |             |
|----------|-------------|-------|------------|-------------|------------|-------------|------------|-------------|
|          |             |       | 6-31G(d,p) | 6-31+G(d,p) | 6-31G(d,p) | 6-31+G(d,p) | 6-31G(d,p) | 6-31+G(d,p) |
| <b>1</b> | R(1,2)      | 1.462 | 1.454      | 1.455       | 1.455      | 1.456       | 1.459      | 1.460       |
|          | R(2,3)      | 1.731 | 1.742      | 1.741       | 1.738      | 1.737       | 1.756      | 1.755       |
|          | R(2,6)      | 1.377 | 1.381      | 1.382       | 1.380      | 1.381       | 1.383      | 1.384       |
|          | R(3,4)      | 1.712 | 1.719      | 1.719       | 1.716      | 1.716       | 1.731      | 1.731       |
|          | R(4,5)      | 1.358 | 1.363      | 1.366       | 1.363      | 1.365       | 1.365      | 1.367       |
|          | R(5,6)      | 1.450 | 1.429      | 1.429       | 1.428      | 1.429       | 1.434      | 1.435       |
|          | R(6,7)      | 1.467 | 1.469      | 1.469       | 1.469      | 1.470       | 1.475      | 1.476       |
| <b>2</b> | R(1,2)      | 1.457 | 1.456      | 1.457       | 1.458      | 1.460       | 1.462      | 1.462       |
|          | R(2,3)      | 1.742 | 1.754      | 1.753       | 1.750      | 1.749       | 1.769      | 1.768       |
|          | R(2,6)      | 1.378 | 1.381      | 1.383       | 1.381      | 1.382       | 1.383      | 1.385       |
|          | R(3,4)      | 1.711 | 1.718      | 1.719       | 1.715      | 1.716       | 1.729      | 1.730       |
|          | R(4,5)      | 1.356 | 1.363      | 1.365       | 1.363      | 1.365       | 1.364      | 1.366       |
|          | R(5,6)      | 1.444 | 1.446      | 1.446       | 1.446      | 1.446       | 1.453      | 1.453       |
|          | R(5,8)      | 1.872 | 1.875      | 1.876       | 1.876      | 1.877       | 1.881      | 1.882       |
| R(6,7)   | 1.472       | 1.472 | 1.472      | 1.472       | 1.472      | 1.478       | 1.478      |             |
| <b>3</b> | R(1,2)      | 1.463 | 1.450      | 1.451       | 1.451      | 1.452       | 1.456      | 1.456       |
|          | R(2,3)      | 1.738 | 1.748      | 1.747       | 1.743      | 1.743       | 1.762      | 1.762       |
|          | R(2,6)      | 1.384 | 1.385      | 1.386       | 1.384      | 1.385       | 1.387      | 1.388       |
|          | R(3,4)      | 1.713 | 1.716      | 1.716       | 1.713      | 1.713       | 1.727      | 1.728       |
|          | R(4,5)      | 1.351 | 1.362      | 1.363       | 1.361      | 1.363       | 1.362      | 1.364       |
|          | R(5,6)      | 1.430 | 1.438      | 1.439       | 1.437      | 1.438       | 1.444      | 1.444       |
|          | R(5,8)      | 1.771 | 1.758      | 1.757       | 1.755      | 1.754       | 1.769      | 1.769       |
| R(6,7)   | 1.459       | 1.458 | 1.458      | 1.458       | 1.458      | 1.465       | 1.464      |             |
| <b>4</b> | R(1,2)      | 1.417 | 1.418      | 1.418       | 1.418      | 1.418       | 1.425      | 1.425       |
|          | R(2,3)      | 1.383 | 1.378      | 1.379       | 1.377      | 1.378       | 1.381      | 1.382       |
|          | R(2,6)      | 1.417 | 1.418      | 1.418       | 1.418      | 1.418       | 1.425      | 1.425       |
|          | R(3,4)      | 1.765 | 1.755      | 1.755       | 1.752      | 1.753       | 1.766      | 1.766       |
|          | R(4,5)      | 1.765 | 1.755      | 1.755       | 1.752      | 1.753       | 1.766      | 1.766       |
|          | R(5,6)      | 1.383 | 1.378      | 1.379       | 1.377      | 1.378       | 1.381      | 1.382       |
|          | R(5,8)      | 1.765 | 1.755      | 1.755       | 1.752      | 1.753       | 1.766      | 1.766       |
| R(6,7)   | 1.417       | 1.418 | 1.418      | 1.418       | 1.418      | 1.425       | 1.425      |             |

R: Bond Length (Å).

**Table S2** Energies (unit: a.u.), ionization potential, electron affinity, hole and electron reorganization energy (unit: eV) of systems **1-4** at optimized ground and ionic states

| System   | Functional | Basis set   | $E_{\text{Cation}}$ | $E_{\text{Neutral}}$ | $E_{\text{Anion}}$ | IP(v) | IP(a) | EA(v)  | EA(a)  | $\lambda_{\text{h}}$ | $\lambda_{\text{e}}$ |
|----------|------------|-------------|---------------------|----------------------|--------------------|-------|-------|--------|--------|----------------------|----------------------|
| <b>1</b> | B3P86      | 6-31G(d,p)  | -2210.0881075       | -2210.3571340        | -2210.3931649      | 7.568 | 7.321 | 0.666  | 0.980  | 0.461                | 0.596                |
|          |            | 6-31+G(d,p) | -2210.1002825       | -2210.3752495        | -2210.4200940      | 7.739 | 7.482 | 0.915  | 1.220  | 0.475                | 0.586                |
|          | PBE0       | 6-31G(d,p)  | -2205.7034100       | -2205.9528436        | -2205.9660378      | 7.047 | 6.787 | 0.028  | 0.359  | 0.482                | 0.612                |
|          |            | 6-31+G(d,p) | -2205.7161051       | -2205.9717796        | -2205.9942733      | 7.226 | 6.957 | 0.293  | 0.612  | 0.496                | 0.612                |
|          | B3LYP      | 6-31G(d,p)  | -2207.0115655       | -2207.2565503        | -2207.2692495      | 6.915 | 6.666 | 0.039  | 0.346  | 0.466                | 0.584                |
|          |            | 6-31+G(d,p) | -2207.0273261       | -2207.2804251        | -2207.3046243      | 7.144 | 6.887 | 0.361  | 0.659  | 0.479                | 0.573                |
| <b>2</b> | B3P86      | 6-31G(d,p)  | -2947.534437        | -2947.7803584        | -2947.8349442      | 6.859 | 6.692 | 1.315  | 1.485  | 0.333                | 0.343                |
|          |            | 6-31+G(d,p) | -2947.5491366       | -2947.8004877        | -2947.8642194      | 7.004 | 6.840 | 1.570  | 1.734  | 0.325                | 0.333                |
|          | PBE0       | 6-31G(d,p)  | -2941.5835889       | -2941.8095766        | -2941.8420537      | 6.323 | 6.149 | 0.706  | 0.884  | 0.345                | 0.358                |
|          |            | 6-31+G(d,p) | -2941.5991006       | -2941.8307903        | -2941.8728734      | 6.474 | 6.305 | 0.974  | 1.145  | 0.336                | 0.345                |
|          | B3LYP      | 6-31G(d,p)  | -2943.3513985       | -2943.5731034        | -2943.6043313      | 6.205 | 6.033 | 0.678  | 0.850  | 0.343                | 0.346                |
|          |            | 6-31+G(d,p) | -2943.3708127       | -2943.6000931        | -2943.6429880      | 6.405 | 6.239 | 1.004  | 1.167  | 0.333                | 0.333                |
| <b>3</b> | B3P86      | 6-31G(d,p)  | -3004.591308        | -3004.8525017        | -3004.9246206      | 7.245 | 7.107 | 1.855  | 1.962  | 0.277                | 0.214                |
|          |            | 6-31+G(d,p) | -3004.6025190       | -3004.8682377        | -3004.9484503      | 7.364 | 7.231 | 2.078  | 2.183  | 0.271                | 0.209                |
|          | PBE0       | 6-31G(d,p)  | -2999.3894623       | -2999.6309558        | -2999.6815311      | 6.714 | 6.571 | 1.265  | 1.376  | 0.287                | 0.223                |
|          |            | 6-31+G(d,p) | -2999.4009830       | -2999.6471642        | -2999.7062402      | 6.838 | 6.699 | 1.498  | 1.608  | 0.280                | 0.217                |
|          | B3LYP      | 6-31G(d,p)  | -3000.9746242       | -3001.2111741        | -3001.2601625      | 6.580 | 6.437 | 1.218  | 1.333  | 0.288                | 0.228                |
|          |            | 6-31+G(d,p) | -3001.9889451       | -3001.2319739        | -3001.2915943      | 6.752 | 6.613 | 1.510  | 1.622  | 0.281                | 0.221                |
| <b>4</b> | B3P86      | 6-31G(d,p)  | -3799.0648494       | -3799.3467742        | -3799.3700778      | 7.735 | 7.672 | 0.385  | 0.634  | 0.125                | 0.424                |
|          |            | 6-31+G(d,p) | -3799.0773569       | -3799.3622767        | -3799.3987307      | 7.814 | 7.753 | 0.794  | 0.992  | 0.121                | 0.352                |
|          | PBE0       | 6-31G(d,p)  | -3793.0456946       | -3793.3092257        | -3793.3086928      | 7.236 | 7.171 | -0.256 | -0.015 | 0.129                | 0.419                |
|          |            | 6-31+G(d,p) | -3739.0584052       | -3739.3250604        | -3739.3389243      | 7.317 | 7.256 | 0.170  | 0.377  | 0.123                | 0.361                |
|          | B3LYP      | 6-31G(d,p)  | -3794.9088466       | -3795.1662324        | -3795.1659147      | 7.066 | 7.004 | -0.224 | -0.009 | 0.125                | 0.393                |
|          |            | 6-31+G(d,p) | -3794.9243865       | -3795.1864453        | -3795.2033125      | 7.193 | 7.131 | 0.292  | 0.459  | 0.123                | 0.317                |

All the data are calculated with high precision (OPT=Tight, Integral(Grid)=UltraFineGrid, and SCF=Tight). IP(v): vertical ionization potential. IP(a): adiabatic ionization potential. EA(v): vertical electron affinity. EA(a): adiabatic electron affinity.  $\lambda_{\text{h}}$ : hole reorganization energy.  $\lambda_{\text{e}}$ : electron reorganization energy.

**Table S3** Ionization potential, electron affinity, hole and electron reorganization energy (unit: eV) of systems **4** at optimized ground and ionic states

| Basis set   | Methods | Hartree-Fock-like<br>exchange | IP(v) | IP(a) | EA(v)  | EA(a)  | $\lambda_h$ | $\lambda_e$ |
|-------------|---------|-------------------------------|-------|-------|--------|--------|-------------|-------------|
| 6-31G(d,p)  | BLYP    | 0.00                          | 6.516 | 6.465 | 0.010  | 0.178  | 0.102       | 0.324       |
|             | O3LYP   | 0.12                          | 6.911 | 6.855 | -0.196 | 0.060  | 0.112       | 0.426       |
|             | B3LYP   | 0.20                          | 7.066 | 7.004 | -0.224 | -0.009 | 0.125       | 0.393       |
|             | B3P86   | 0.20                          | 7.735 | 7.672 | 0.385  | 0.634  | 0.125       | 0.424       |
|             | PBE0    | 0.25                          | 7.236 | 7.171 | -0.256 | -0.015 | 0.129       | 0.419       |
|             | MPW1K   | 0.37                          | 7.933 | 7.553 | -0.975 | 0.103  | 0.820       | 1.440       |
|             | BHHLYP  | 0.50                          | 7.869 | 7.442 | -1.158 | -0.124 | 0.951       | 1.644       |
|             | MP2     |                               | 8.175 |       | -0.862 |        |             |             |
| 6-31+G(d,p) | BLYP    | 0.00                          | 6.678 | 6.629 | 0.598  | 0.691  | 0.099       | 0.205       |
|             | O3LYP   | 0.12                          | 7.024 | 6.968 | 0.346  | 0.497  | 0.111       | 0.289       |
|             | B3LYP   | 0.20                          | 7.193 | 7.131 | 0.292  | 0.459  | 0.123       | 0.317       |
|             | B3P86   | 0.20                          | 7.814 | 7.753 | 0.794  | 0.992  | 0.121       | 0.352       |
|             | PBE0    | 0.25                          | 7.317 | 7.256 | 0.170  | 0.377  | 0.123       | 0.361       |
|             | MPW1K   | 0.37                          | 7.628 | 7.553 | -0.073 | 0.103  | 0.151       | 0.337       |
|             | BHHLYP  | 0.50                          | 7.525 | 7.442 | -0.254 | -0.124 | 0.166       | 0.286       |

IP(v): vertical ionization potential. IP(a): adiabatic ionization potential. EA(v): vertical electron affinity. EA(a): adiabatic electron affinity.  $\lambda_h$ : hole reorganization energy.  $\lambda_e$ : electron reorganization energy.

**Table S4** Selected geometry parameters of systems **1-4** at optimized neutral and ionic states based on B3P86/6-31+G(d,p) level

|             | 1       |        |        | 2       |        |        | 3       |        |        | 4       |        |        |
|-------------|---------|--------|--------|---------|--------|--------|---------|--------|--------|---------|--------|--------|
|             | Neutral | Cation | Anion  |
| R(1,2)      | 1.455   | 1.430  | 1.429  | 1.457   | 1.430  | 1.432  | 1.451   | 1.421  | 1.425  | 1.418   | 1.409  | 1.430  |
| R(2,3)      | 1.741   | 1.740  | 1.773  | 1.753   | 1.750  | 1.779  | 1.747   | 1.745  | 1.772  | 1.379   | 1.387  | 1.390  |
| R(2,6)      | 1.382   | 1.412  | 1.406  | 1.383   | 1.412  | 1.404  | 1.386   | 1.416  | 1.404  | 1.418   | 1.409  | 1.430  |
| R(3,4)      | 1.719   | 1.717  | 1.731  | 1.719   | 1.719  | 1.730  | 1.716   | 1.716  | 1.736  | 1.755   | 1.753  | 1.758  |
| R(4,5)      | 1.366   | 1.365  | 1.363  | 1.365   | 1.363  | 1.362  | 1.363   | 1.364  | 1.360  | 1.755   | 1.753  | 1.758  |
| R(5,6)      | 1.429   | 1.425  | 1.433  | 1.446   | 1.443  | 1.452  | 1.439   | 1.438  | 1.440  | 1.379   | 1.387  | 1.390  |
| R(5,8)      | -       | -      | -      | 1.876   | 1.885  | 1.859  | 1.757   | 1.750  | 1.763  | 1.755   | 1.753  | 1.758  |
| R(6,7)      | 1.469   | 1.448  | 1.453  | 1.472   | 1.448  | 1.461  | 1.458   | 1.429  | 1.441  | 1.418   | 1.409  | 1.430  |
| A(1,2,3)    | 120.0   | 118.3  | 117.4  | 116.6   | 116.4  | 115.7  | 117.9   | 118.3  | 117.9  | 112.5   | 112.5  | 112.2  |
| A(1,2,6)    | 129.1   | 130.6  | 132.4  | 133.6   | 133.7  | 134.9  | 132.2   | 132.0  | 132.5  | 135.0   | 135.0  | 135.0  |
| A(2,3,4)    | 92.10   | 92.02  | 92.35  | 92.70   | 92.43  | 92.76  | 93.66   | 93.46  | 93.30  | 112.7   | 112.7  | 112.9  |
| A(2,6,5)    | 112.2   | 111.5  | 111.5  | 113.1   | 112.5  | 112.2  | 111.6   | 111.3  | 111.2  | 112.5   | 112.5  | 112.2  |
| A(2,6,7)    | 125.1   | 127.5  | 128.4  | 133.2   | 133.7  | 134.0  | 137.8   | 138.0  | 137.5  | 135.0   | 135.0  | 135.0  |
| A(3,4,5)    | 111.6   | 112.3  | 111.1  | 111.8   | 112.8  | 111.5  | 109.8   | 111.0  | 109.7  | 89.63   | 89.67  | 89.73  |
| A(4,5,6)    | 113.3   | 113.5  | 115.1  | 112.5   | 112.4  | 114.2  | 115.0   | 114.6  | 116.2  | 112.7   | 112.7  | 112.9  |
| A(5,6,7)    | 122.6   | 120.6  | 119.9  | 113.6   | 113.7  | 113.8  | 110.6   | 110.7  | 111.3  | 112.5   | 112.5  | 112.2  |
| A(8,5,4)    | -       | -      | -      | 135.7   | 135.1  | 134.7  | 130.2   | 130.5  | 129.9  | 134.6   | 134.7  | 133.4  |
| A(8,5,6)    | -       | -      | -      | 111.1   | 112.3  | 110.9  | 114.7   | 115.0  | 113.8  | 112.7   | 112.7  | 112.9  |
| D(1,2,3,4)  | -176.9  | -173.8 | -174.3 | -172.0  | -171.3 | -174.3 | -179.7  | -179.8 | -180.0 | -180.0  | -180.0 | -172.0 |
| D(1,2,6,5)  | 176.7   | 172.3  | 173.8  | 170.0   | 168.8  | 173.2  | 179.7   | 179.8  | 180.0  | 179.8   | 180.0  | 170.1  |
| D(3,2,1,3') | 50.35   | 33.92  | 33.42  | 22.29   | 17.09  | 12.72  | 0.628   | 0.244  | 0.019  | 0.000   | 0.000  | 0.000  |

R: Bond Length (Å); A: Bond Angle (°); D: Dihedral Angle (°).

**Fig. S1** The evolution trends in IP(a), EA(a),  $\lambda_h$  and  $\lambda_e$  from molecule **1** to **4** with B3P86, B3LYP and PBE0 methods. The black, blue and red values are calculated by B3P86, B3LYP and PBE0 methods, respectively. The dashed and solid lines represent 6-31G(d,p) and 6-31+G(d,p) basis sets, respectively. The green  $\lambda$  values are computed with BHHLYP/6-31+G(d,p).

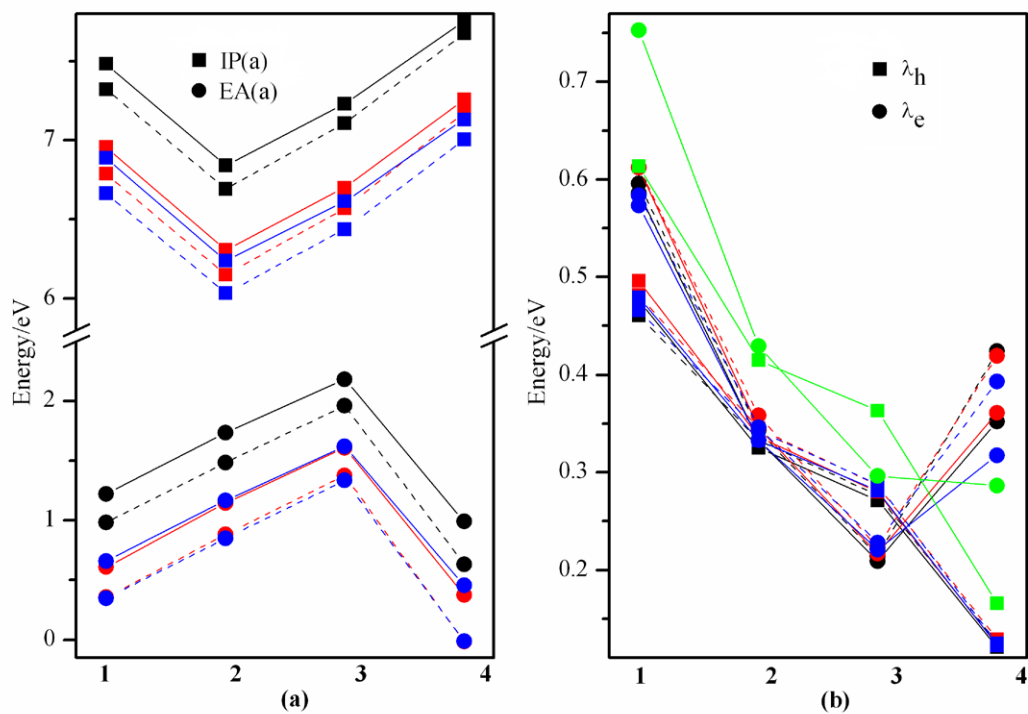

**Fig. S2** Density of states (total DOS in black line and sulfur atoms partial DOS in red line) of system 4

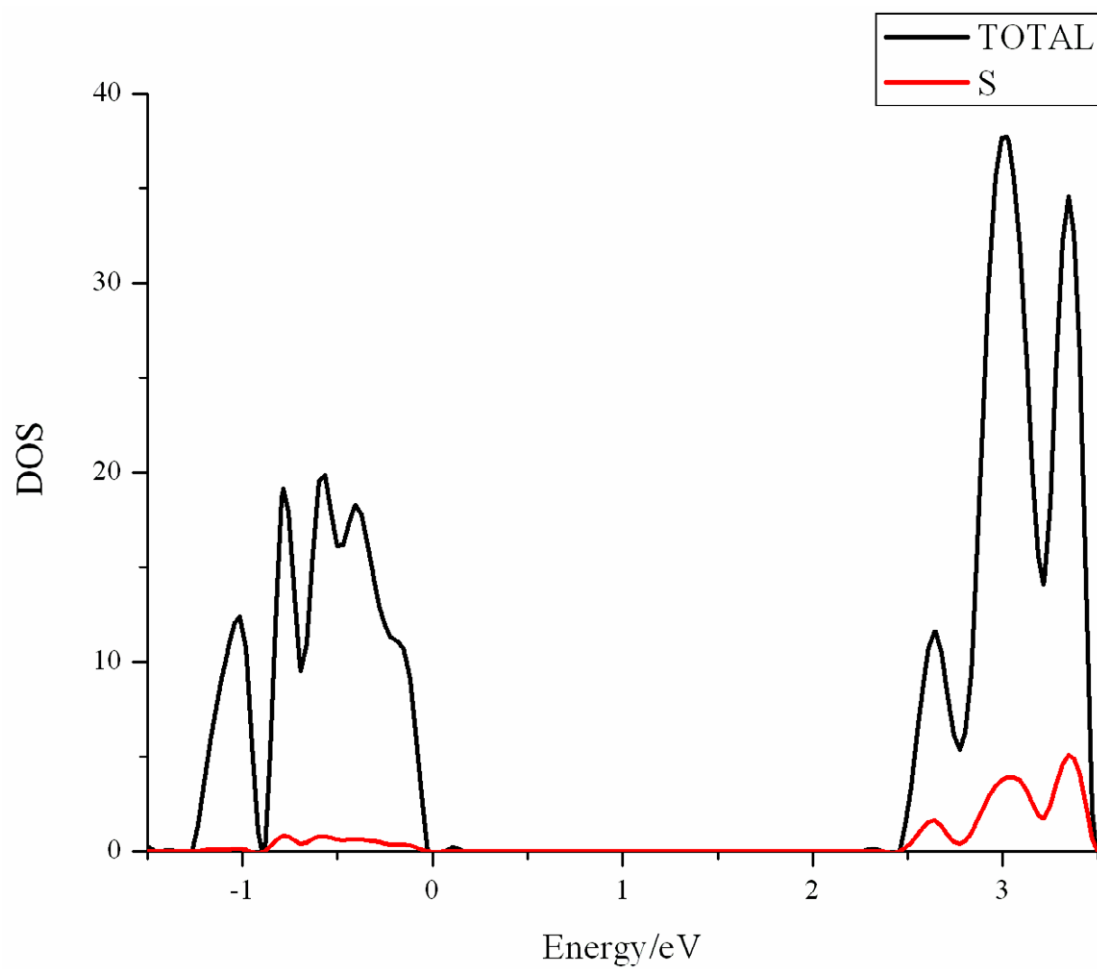

Supplement: c2jm14871d.pdf [file c2jm14871d.pdf]
